# Supplementary material for: Preparation of phenyl group functionalized g-C3N4 nanosheets with extended electron delocalization for enhanced visible-light photocatalytic activity
Source: Royal Society of Chemistry journal article supplement (doi:10.1039/c8nj00298c), 2018-01-01
Supplement: c8nj00298c1.pdf [file c8nj00298c1.pdf]

## Preparation of phenyl group functionalized g-C<sub>3</sub>N<sub>4</sub> nanosheets with extended electron delocalization for enhanced visible-light photocatalytic activity

Yunfeng Li,<sup>a</sup> Renxi Jin,<sup>b</sup> Gaijuan Li,<sup>c</sup> Xianchun Liu,<sup>a</sup> Min Yu,<sup>a</sup> Yan Xing,<sup>\*a</sup> and Zhan Shi<sup>d</sup>

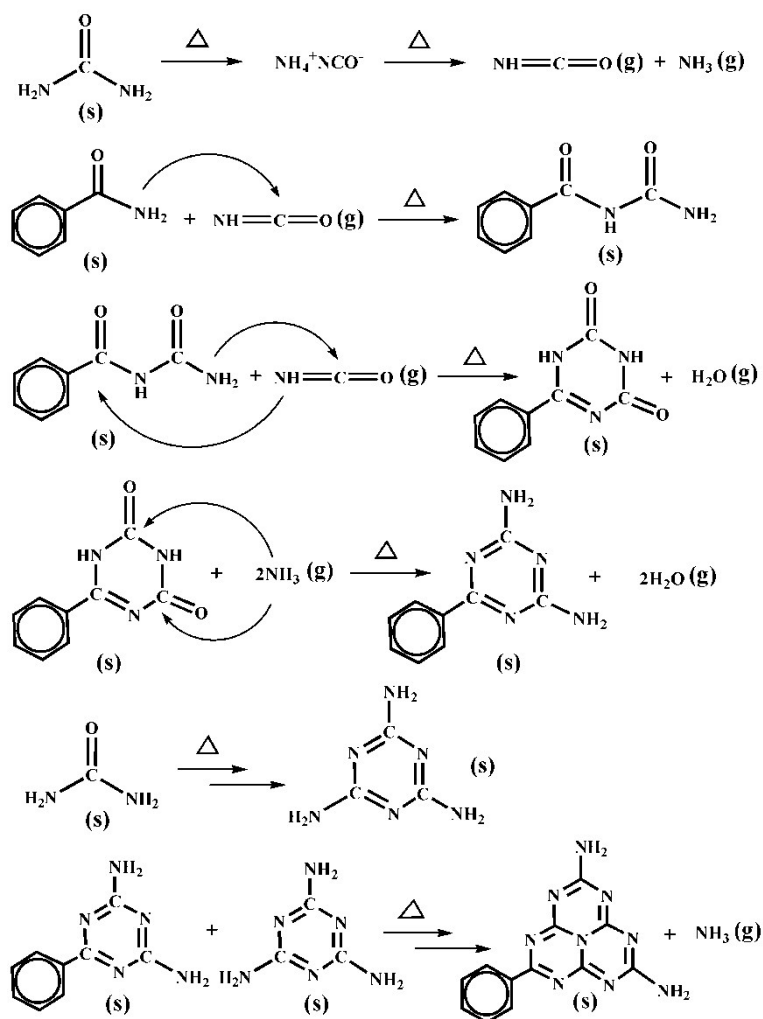

**Figure S1.** The proposed reaction mechanism of co-polymerization steps for urea and benzamide

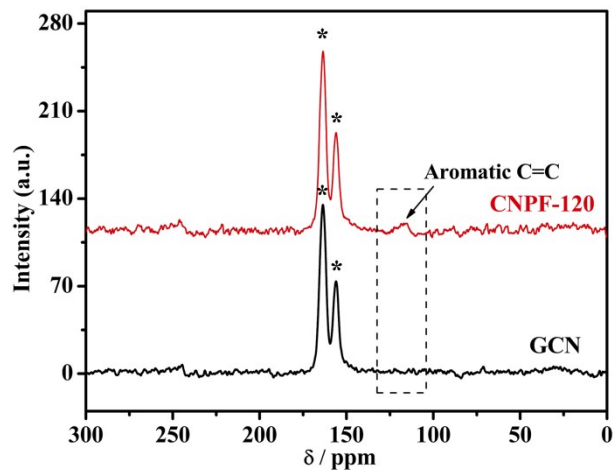

**Figure S2.** Solid-state  $^{13}\text{C}$  NMR spectra of GCN and CNPF-120 samples.

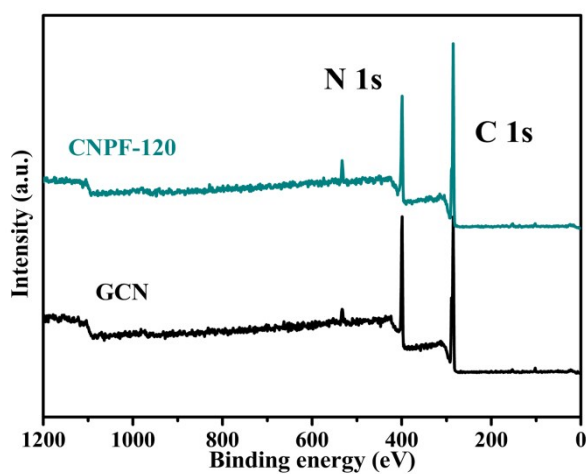

**Figure S3.** XPS survey spectra of GCN and CNPF-120.

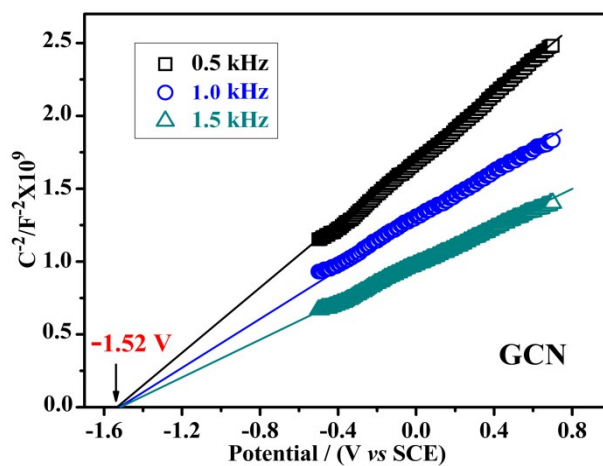

**Figure S4.** Mott-Schottky plots of GCN with the frequency of 0.5, 1.0 and 1.5 kHz.

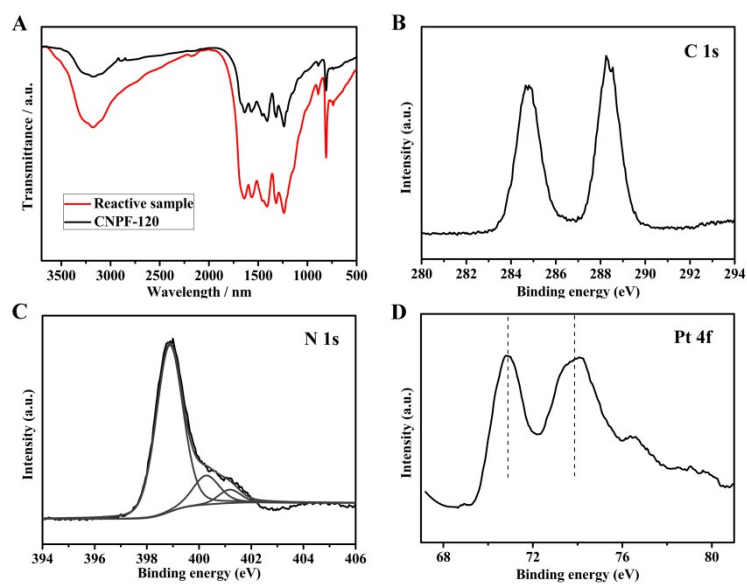

**Figure S5.** A) FT-IR and B-D) high-resolution XPS spectra of CNPF-120 after photocatalytic reaction.

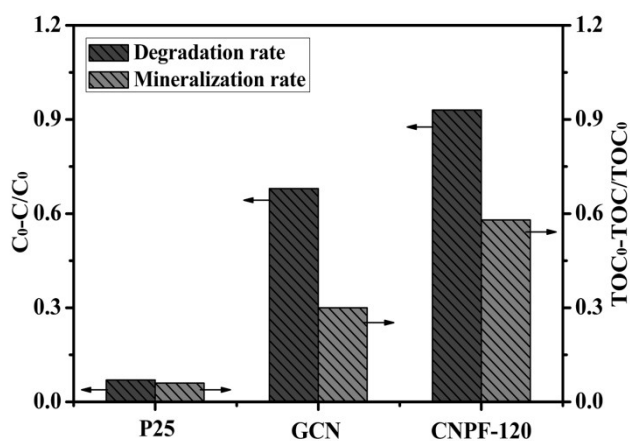

**Figure S6.** Changes of TOC for photo-degradation of RhB over different photocatalysts.
